# Supplementary material
Source: MDPI journal article supplement (https://www.mdpi.com/2072-4292/10/9/1335)

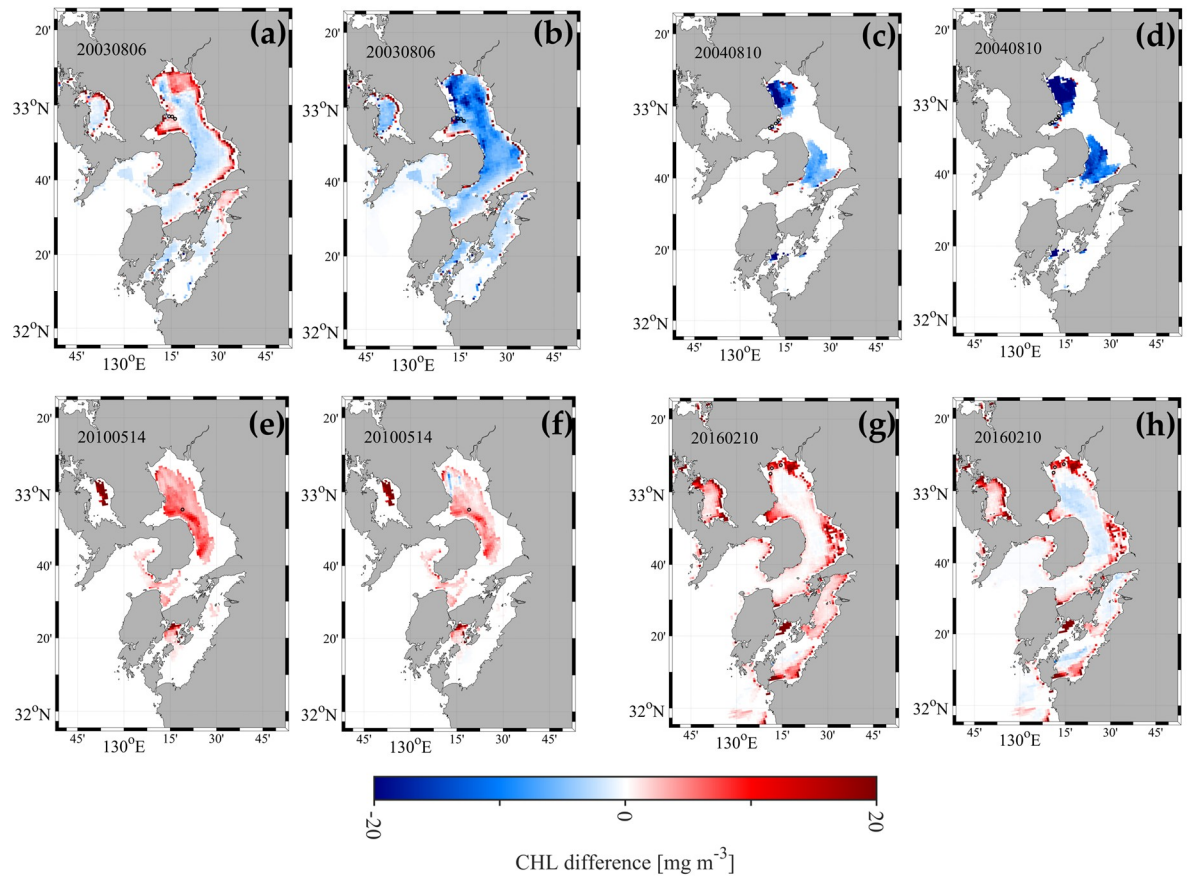

**Figure S1**

Supplement: s2 [file s2]
